# Supplementary material for: ortho-Heterofluorene perylenediimides: synthesis, photophysical, and exciton dynamic properties
Source: Royal Society of Chemistry journal article supplement (doi:10.1039/c6cp04930c), 2016-01-01
Supplement: c6cp04930c1.pdf [file c6cp04930c1.pdf]

## Supporting Information

### Near-Unity Quantum Yields for Singlet Oxygen Generation in Heterofluorene Perylenediimides

Zhenyi Yu,<sup>1,2</sup> Yishi Wu,<sup>1,\*</sup> Jianwei Chen,<sup>1,2</sup> Chunlin Sun,<sup>1</sup> Jiannian Yao<sup>1,3,4</sup> and  
Hongbing Fu<sup>1,3,4,\*</sup>

<sup>1</sup> Beijing National Laboratory for Molecular Sciences (BNLMS), Institute of Chemistry, Chinese Academy of Sciences, Beijing 100190, P. R. China.

<sup>2</sup> Graduated University of Chinese Academy of Sciences, Beijing 100049, P. R. China.

<sup>3</sup> Beijing Key Laboratory for Optical Materials and Photonic Devices, Department of Chemistry, Capital Normal University, Beijing 100048, P. R. China.

<sup>4</sup> Collaborative Innovation Center of Chemical Science and Engineering, Tianjin 300072, People's Republic of China

E-mail: yswu@iccas.ac.cn; hongbing.fu@iccas.ac.cn

## Experimental Section

### 1. Synthesis and Compound Data

#### ***N,N'*-Bis(1-ethylpropyl)-2,5,8,11-tetrakis(9-phenyl-9H-carbazol-3-yl)perylene-**

**3,4:9,10-tetracarboxylic acid (1):** A mixture of *N,N'*-Bis(1-ethylpropyl) perylene-3, 4, 9, 10-tetracarboxylic acid (106.0 mg, 0.20 mmol), 9-phenyl-9H-carbazol-3-yl boronic acid neopentyl glycol ester (568mg, 1.6 mmol), and [RuH<sub>2</sub>(CO)(PPh<sub>3</sub>)<sub>3</sub>] (45.8 mg, 0.05 mmol) in 1.5 ml of mesitylene and 1.5 ml of pinacolone was stirred under argon at 160 °C (bath temp) for 48h. The reaction mixture was purified by Petroleum ether/CH<sub>2</sub>Cl<sub>2</sub> 1:2. After recrystallization from CH<sub>2</sub>Cl<sub>2</sub>/Methanol, compound was obtained in 50% yield (150 mg). <sup>1</sup>H NMR (CD<sub>2</sub>Cl<sub>2</sub>): δ 0.85 (t, J = 7.4, 12H), 1.60-1.66 (m, 4H), 2.00-2.03 (m, 4H), 4.69-4.77 (m, 2H), 7.17-7.19 (m, 4H), 7.32-7.37 (m, 8H), 7.40-7.47 (m, 12H) 7.53-7.60 (m, 16H) 8.01-8.03 (d, 4H) 8.22 (s, 4H) 8.60 (s, 4H); <sup>13</sup>C NMR (CD<sub>2</sub>Cl<sub>2</sub>): δ 11.18, 25.19, 57.52, 57.97, 109.47, 109.91, 120.06, 121.51, 123.28, 124.96, 126.11, 126.93, 127.02, 127.57, 127.94, 129.92, 131.52, 132.70, 134.37, 137.49, 140.36, 141.32, 148.33; λ<sub>max</sub> (ε[M<sup>-1</sup>cm<sup>-1</sup>]) = 468 (1.8×10<sup>4</sup>), 500 (4.3×10<sup>4</sup>), 534 (6.4×10<sup>4</sup>) nm; Fluorescence (CH<sub>2</sub>Cl<sub>2</sub>, λ<sub>ex</sub> = 490 nm) λ<sub>em</sub> = 540, 582 nm; HR-MS (MALDI-MS): m/z = 1495.7.

#### ***N,N'*-Bis(1-ethylpropyl)-2,5,8,11-tetrakis(9,9-dimethyl-9H-fluorene-2-yl)perylene-**

**3,4:9,10-tetracarboxylic acid (2):** A mixture of *N,N'*-Bis(1-ethylpropyl) perylene-3, 4, 9, 10-tetracarboxylic acid (106.0 mg, 0.20 mmol), RuH<sub>2</sub>(CO)(PPh<sub>3</sub>)<sub>3</sub> (45.8 mg, 0.05 mmol), and 9,9-dimethyl-9H-fluorene-2-ylboronic acid neopentyl ester (306 mg, 1.00 mmol) in 3.0 ml of mesitylene and pinacolone (1:1) was stirred under argon at 160 °C (bath temp) for 40 h. The reaction mixture was purified by CH<sub>2</sub>Cl<sub>2</sub>/Petroleum ether 1:1. After recrystallization from CH<sub>2</sub>Cl<sub>2</sub>/Ethanol, compound was obtained in 60% yield (156 mg). <sup>1</sup>H NMR (CD<sub>2</sub>Cl<sub>2</sub>): δ 0.87 (t, J = 7.4, 12H), 1.46 (s, 24H), 1.58–1.68 (m, 4H), 1.98–2.09 (m, 4H), 3.84 (s, 12H), 4.71-4.78 (m, 2H), 7.28-7.34 (m, 8H), 7.42-7.46 (m, 2H), 7.74-7.76 (d, 4H), 7.80-7.82 (d, 4H), 8.55 (s, 4H); <sup>13</sup>C NMR (CD<sub>2</sub>Cl<sub>2</sub>): δ 11.22, 24.90, 25.94, 46.96, 57.74, 67.43, 99.71, 119.90, 120.19, 121.72, 122.54, 123.04, 125.23, 127.17, 127.49, 131.41, 132.77, 138.71, 141.46, 148.09, 153.66, 163.68; UV/Vis (CH<sub>2</sub>Cl<sub>2</sub>): λ<sub>max</sub> (ε[M<sup>-1</sup>cm<sup>-1</sup>]) = 467 (23000), 498 (38000), and 536 (49000) nm;

HR-MS (MALDI-MS):  $m/z = 1299.64$ . Fluorescence ( $\text{CH}_2\text{Cl}_2$ ,  $\lambda_{\text{ex}} = 490 \text{ nm}$ )  $\lambda_{\text{em}} = 555, 609 \text{ nm}$ ;

**N,N'-Bis(1-ethylpropyl)-2,5,8,11-tetrakis(dibenzothiophene-1-yl)perylene-3,4:9,10-tetracarboxylic acid (3)**: A mixture of N, N'- Bis (1-ethylpropyl) perylene-3, 4, 9, 10-tetracarboxylic acid (106.0 mg, 0.20 mmol),  $\text{RuH}_2(\text{CO})(\text{PPh}_3)_3$  (45.8 mg, 0.05 mmol), and p- dibenzothiophene-1-yl-boronic acid neopentyl ester (296.2 mg, 1.00 mmol) in 3.0 ml of mesitylene and pinacolone (1:1) was stirred under argon at 160 °C (bath temp) for 40 h. The reaction mixture was purified by Petroleum ether/ $\text{CH}_2\text{Cl}_2$  1:2. After recrystallization from  $\text{CH}_2\text{Cl}_2$ /Ethanol, compound was obtained in 70% yield (176.3 mg).  $^1\text{H}$  NMR ( $\text{CD}_2\text{Cl}_2$ ):  $\delta$  0.69 (t,  $J = 7.4$ , 12H), 1.32–1.52 (m, 4H), 1.61–1.89 (m, 4H), 4.46–4.55 (m, 2H), 7.31-7.47(m, 12H), 7.48-7.58(m, 4H), 7.61-7.78(m, 4H) 8.14-8.17(m, 8H), 8.53 (m, 4H);  $^{13}\text{C}$  NMR ( $\text{CD}_2\text{Cl}_2$ ):  $\delta$  11.07, 21.45, 24.71, 57.68, 120.66, 121.85, 122.55, 124.52, 125.03, 126.38, 126.87, 127.72, 131.19, 133.53, 135.68, 137.61, 138.46, 139.14, 145.22, 156.22, 162.01; UV/Vis ( $\text{CH}_2\text{Cl}_2$ ):  $\lambda_{\text{max}}$  ( $\epsilon[\text{M}^{-1}\text{cm}^{-1}]$ ) = 464 (20000), 495 (33000), and 532 (41000) nm; HR-MS (MALDI-MS):  $m/z = 1259.58$ . Fluorescence ( $\text{CH}_2\text{Cl}_2$ ,  $\lambda_{\text{ex}} = 490 \text{ nm}$ )  $\lambda_{\text{em}} = 542, 578 \text{ nm}$ ;

## 2. Spectral Characterization and Photophysical Parameters

**Steady-State Spectroscopic Measurements.** The UV-visible absorption spectra were measured on a Shimadzu UV-3600 spectrometer with a slit width of 1 nm. The fluorescence emission spectroscopy was measured on a Hitachi F-4500 spectrophotometer. The fluorescence quantum yield was obtained by the comparative method using Rhodamine 6G as a standard ( $\Phi_{\text{F}} = 0.95$ ) in case of a dilute solution ( $A < 0.10$ ). Near-infrared luminescence spectroscopy were performed with Edinburgh FLS-920 apparatus at 77 K, The excitation wavelength at 490 nm were produced by a xenon lamp. The solvents used were chromatographic grade and purchased.

**Quantum Chemical Calculations.** We performed theoretical calculations by the DFTB3LYP/6-31G(d) method with the GAUSSIAN-03 software package. (Frisch M. J. et al. Gaussian03, RevisionB.1, Gaussian, Inc., Pittsburgh, PA, 2003.) The optimized

configurations were generated using the GaussView software.

**Fluorescence Lifetime Measurements.** The home-built ps time-resolved fluorescence apparatus is described as below: The excitation laser pulses (480 nm) were generated by an optical parametric amplifier (OPA-800CF, Spectra Physics), and pumped by a regenerative amplifier (Spitfire, Spectra Physics). The excitation energy at the sample was  $\sim 100$  nJ/pulse. Fluorescence collected with the 90°-geometry was dispersed by a polychromator (250is, Chromex) and detected with a streak camera (C5680, Hamamatsu Photonics). The spectral resolution was 0.2 nm, and the temporal resolution was about 100 ps on the measured delay-time-range setting.

**Femtosecond Transient Absorption Spectroscopy.** The laser pulses of the femtosecond transient absorption was generated by A Ti:sapphire femtosecond laser system. The a mode-locked Ti:sapphire laser (Tsunami, Spectra Physics) delivered laser pulses at 800 nm (120 fs, 1 kHz) as a seed to aregenerative amplifier (Spitfire, Spectra Physics), and were then divided into two components. The major one was used to generate the pump pulses (480 nm, 130 fs, 1 kHz), and the minor to generate the probe pulses. The probe wavelength was selected by a band-pass filter. Using a computer-controlled motorized translation stage, the time delay between the probe and pump beams were regulated. The temporal resolution was determined about 150 fs and the transmitted light was detected by a linear image sensor (S8377-512Q, Hamamatsu). The 1 mm rotating sample cell was excited by 0.1  $\mu$ J/pulse. A typical absorbance at the excitation wavelength was 0.4–0.6.

**Nanosecond flash photolysis.** The SHG output (532 nm) and the THF output (355 nm) of the Nd:YAG laser (Continuum Surelite II, 7 ns fwhm) were used for direct excitation and for anthracene-sensitization excitation, respectively. A pulsed xenon arc lamp was used to provide the analyzing light. The configuration of the monitoring light with respect to the excitation laser pulse is a perpendicular geometry. The liquid samples (1.0 cm quartz cell) were settled on the platform at the intersection of the monitoring light and the excitation pulse. All the samples are optically dilute at the laser excitation wavelength. The signals were detected by the Edinburgh LP920

and recorded on the Tektronix TDS 3012B oscilloscope and computer. The triplet lifetimes were obtained by kinetic analysis of the transient absorption. The dissolved oxygen was removed, through bubbling with high purity N<sub>2</sub> for ~30 min. All the spectra were measured at room temperature if no further notification.

**Measurement of singlet oxygen yield.** Through continuous photolysis procedure, the quantum yield for generation of singlet oxygen has been described as below. (Diwu Z, et al. *J. Photochem. Photobiol. A: Chem.* **1992**, *64*, 273.) Briefly, 9,10-diphenylanthracene (DPA) was used as a substrate to intercept singlet oxygen because of its nonradiative deactivation. The consumption of singlet oxygen in air-saturated CH<sub>2</sub>Cl<sub>2</sub> solution was measured under 532 nm continuous laser irradiation. The concentration of DPA was prepared at ~ 8 × 10<sup>-4</sup> M. To ensure that an equal number of photons were absorbed at the same irradiation time in all experiments, the absorption of each photosensitizer was adjusted to 0.50 in a 1 cm cell at the wavelength of 532 nm. Therefore, the DPA can efficiently intercept the singlet oxygen. hypocrellin A (HA) (Φ<sub>Δ</sub>= 0.84 in CH<sub>2</sub>Cl<sub>2</sub>) was used as the reference. The singlet oxygen quantum yield was calculated using the equation on:

$$\Phi_{\Delta}^S = \Phi_{\Delta}^R \times \frac{k^S / A^S}{k^R / A^R}$$

The *k* is the slope of singlet oxygen consumption, the *A* is the absorbance at 532nm and the suffixes “S” and “R” refer to the sample and the reference, respectively.

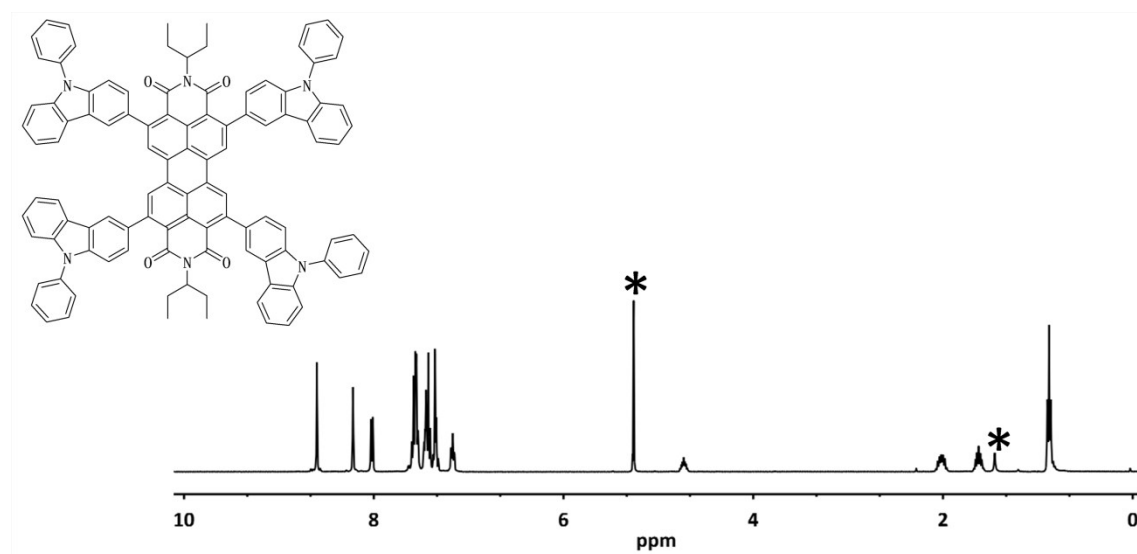

**Figure S1.**  $^1\text{H}$ NMR spectrum of *compound 1* in  $\text{CD}_2\text{Cl}_2$

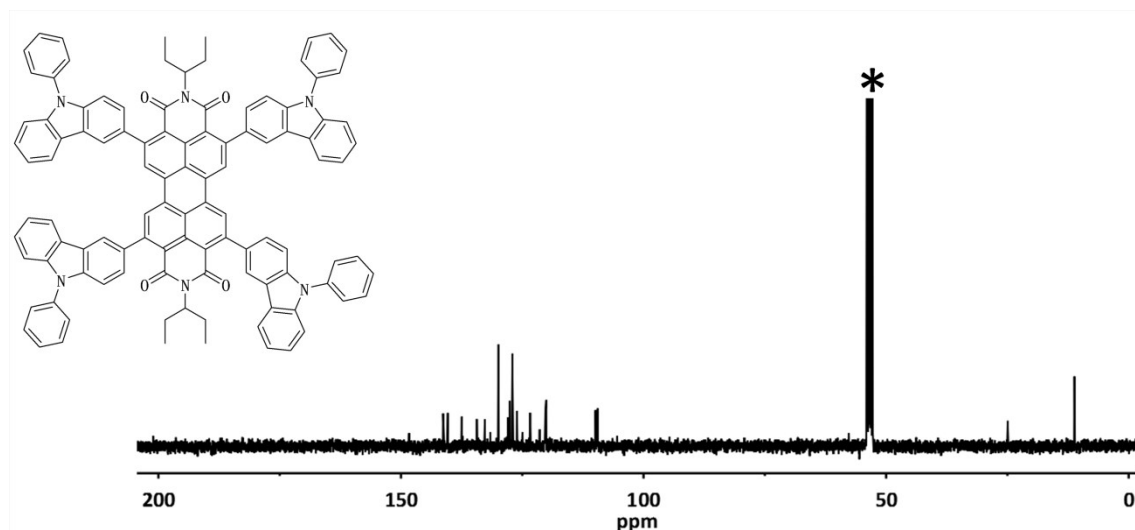

**Figure S2.**  $^{13}\text{C}$ NMR spectrum of *compound 1* in  $\text{CD}_2\text{Cl}_2$

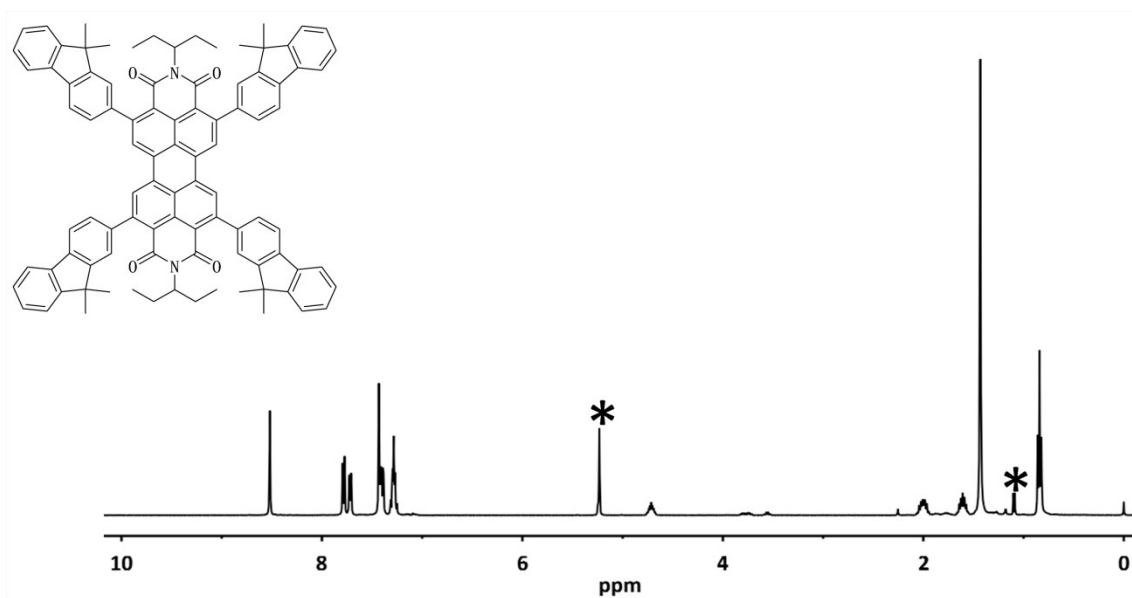

**Figure S3.** <sup>1</sup>H NMR spectrum of *compound 2* in CD<sub>2</sub>Cl<sub>2</sub>



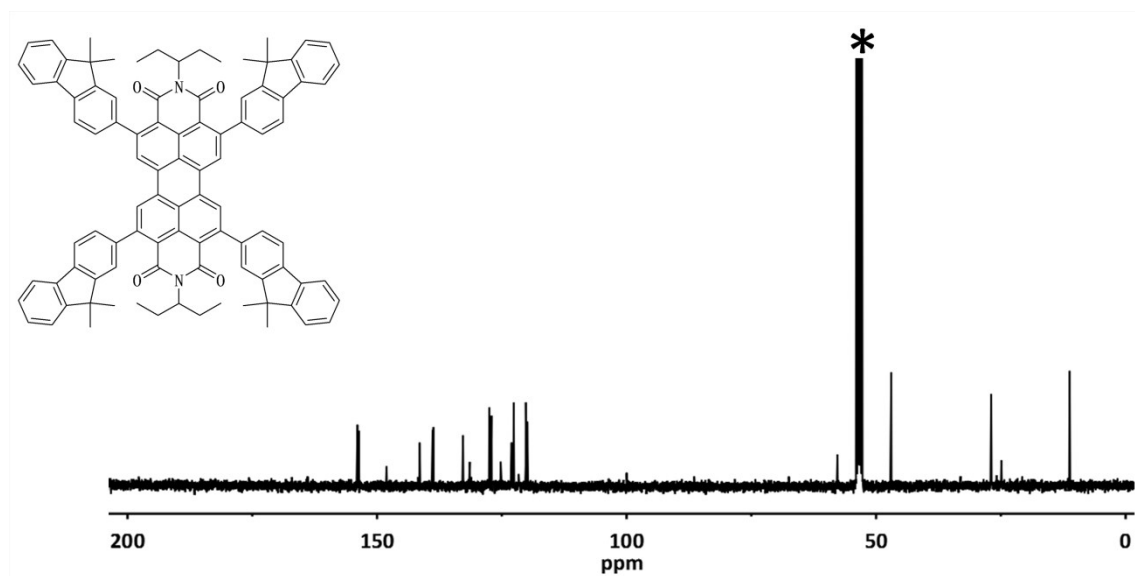

**Figure S4.**  $^{13}\text{C}$ NMR spectrum of *compound 2* in  $\text{CD}_2\text{Cl}_2$

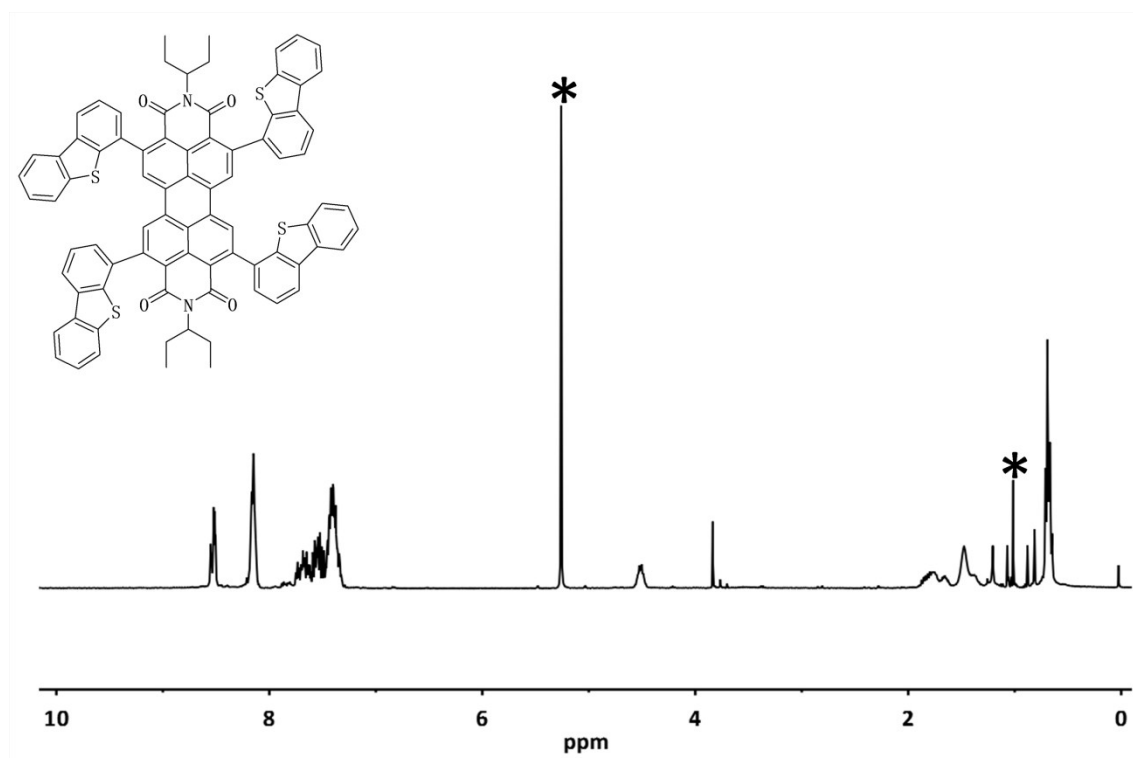

**Figure S5.** <sup>1</sup>H NMR spectrum of *compound 3* in CD<sub>2</sub>Cl<sub>2</sub>

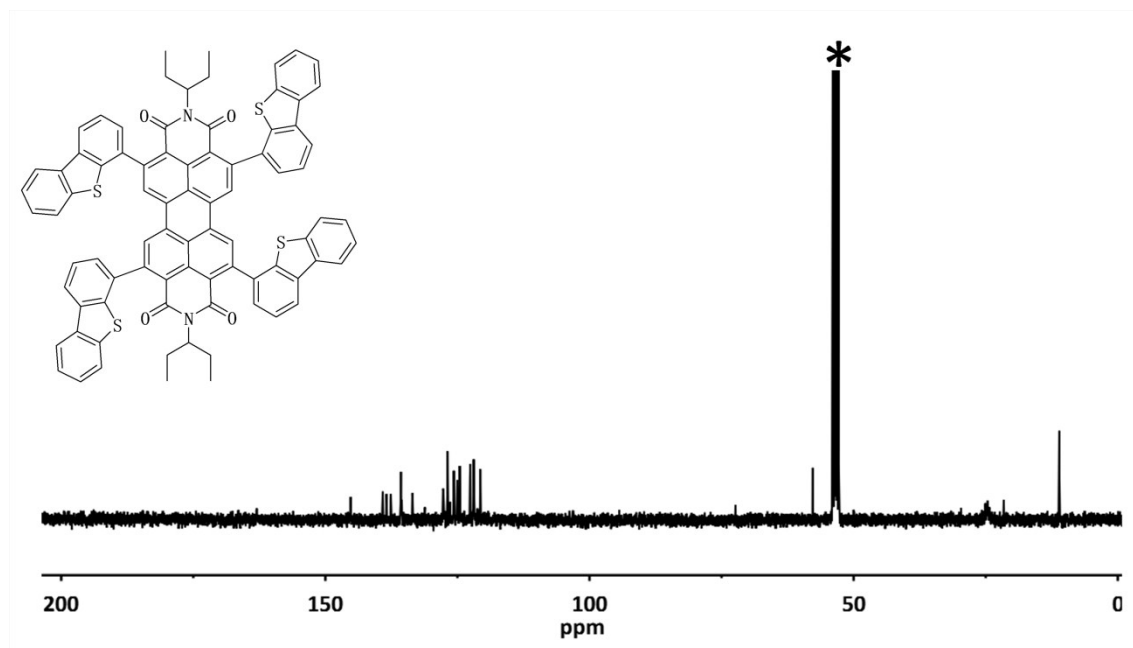

**Figure S6.**  $^{13}\text{C}$ NMR spectrum of *compound 3* in  $\text{CD}_2\text{Cl}_2$

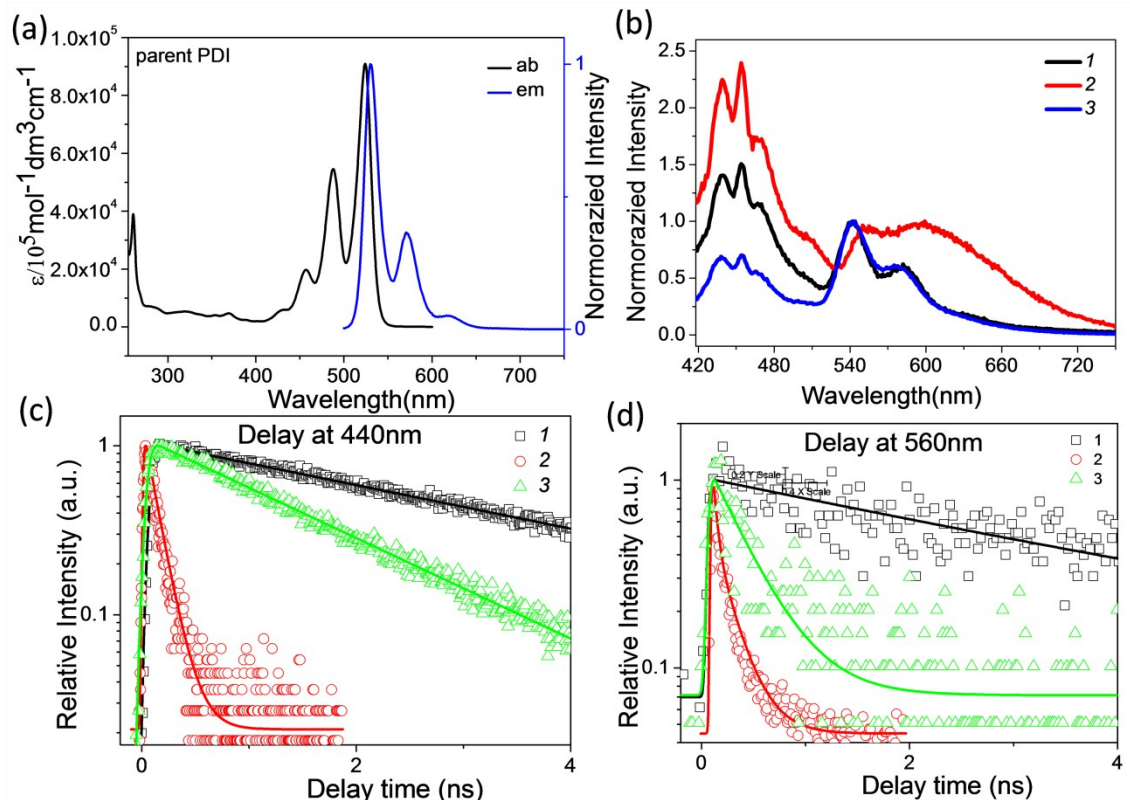

**Figure S7.** Steady-state absorption spectra (black) and fluorescence spectra (blue) of parent PDI in  $\text{CH}_2\text{Cl}_2$  solutions. (b) fluorescence spectra of 1-3 at  $1 \times 10^{-5} \text{ M}$  in  $\text{CH}_2\text{Cl}_2$  solutions (c) (d) decay and fitting curves of monomeric  $\text{CH}_2\text{Cl}_2$  at 440nm and 560nm.

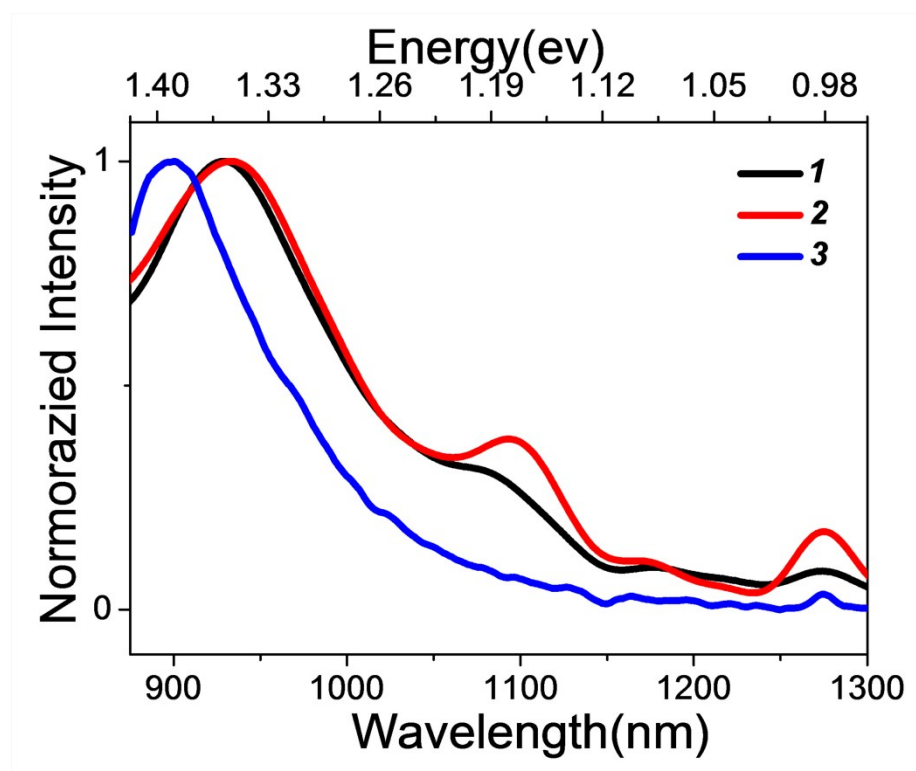

**Figure S8.** Near-infrared phosphorescence spectra in  $N_2$ -saturated  $CH_2Cl_2$  at 77 K.

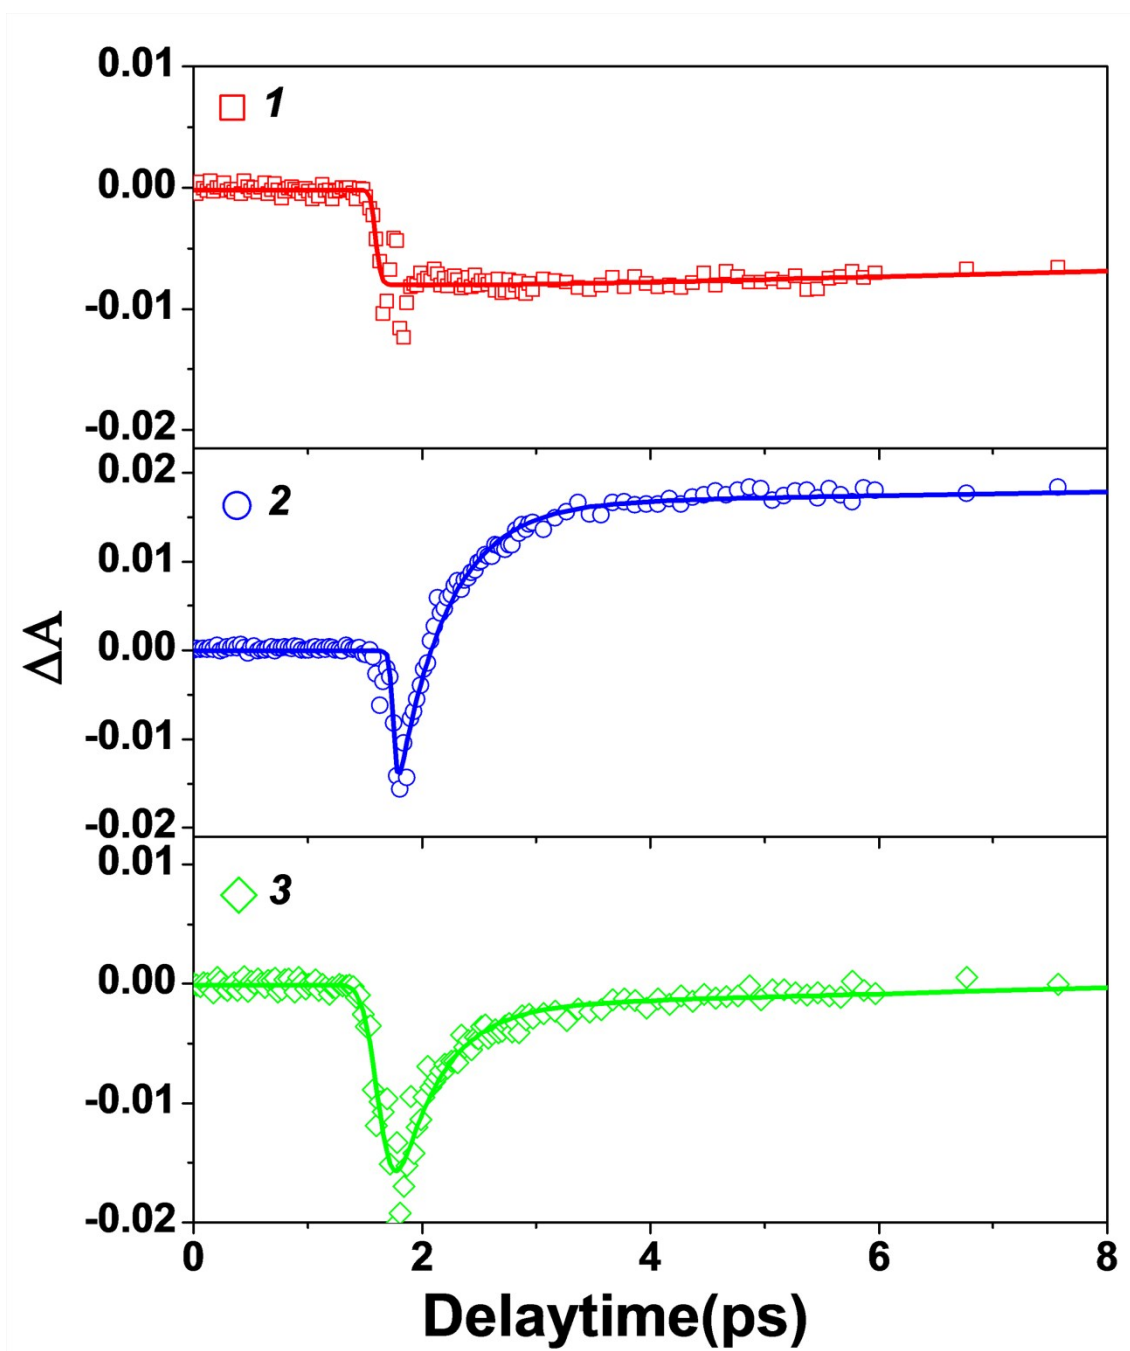

*Figure S9. The linear fitting results are also shown. The corresponding time-absorption profiles at 555nm for 1-3.*

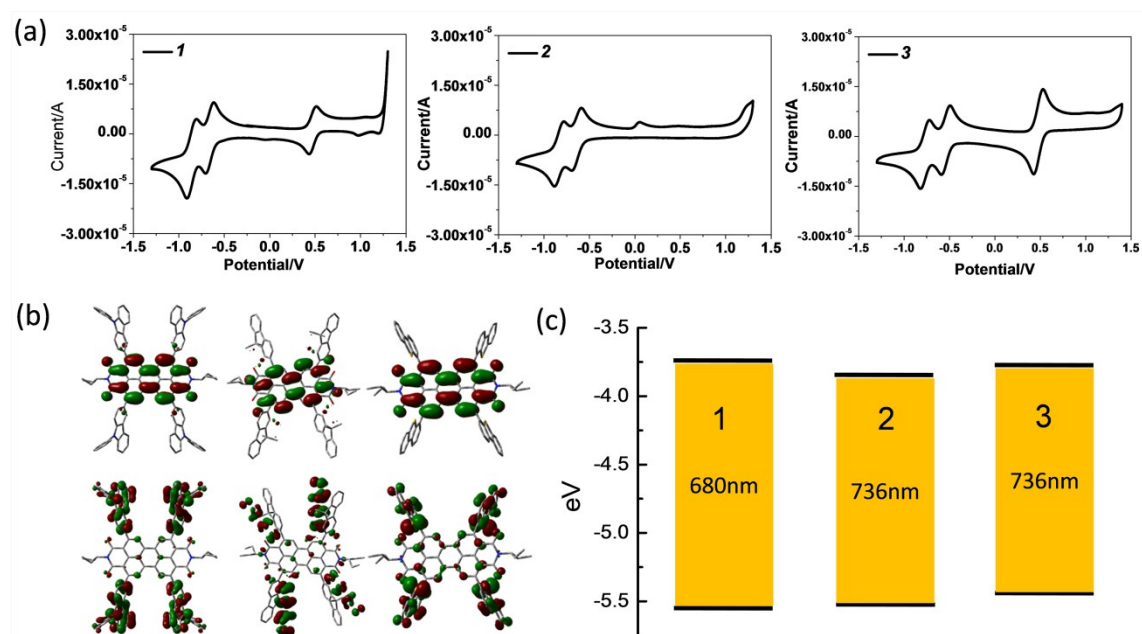

**Figure S10.** (a) cyclic voltammograms of 1-3 in dichloromethane containing 0.1 M *t*-Bu4NPF6 at the scan rate of 100 mV/s. (b) The HOMO and LUMO obtained by density functional method at the B3LYP/6-31G level. (c) Impact of various core substituents on the redox potentials (black lines; vs ferrocene/ferrocenium redox couple) and the optical properties (colored boxes) of PBI dyes. There is a good match between the energy of the optical gap ( $\Delta E = h \times \nu$ ) and the electrochemical gap ( $\Delta E = E_{ox} - E_{red}$ )

**Table S1.** The calculated excitation energies (eV) of the Low-lying excited singlet and triplet states for the three compounds by B3LYP/6-31G(d).

| Excited States | 1      | 2      | 3      |
|----------------|--------|--------|--------|
| S1             | 1.7468 | 1.9138 | 1.9098 |
| S2             | 1.7704 | 1.9415 | 1.9116 |
| S3             | 1.7772 | 2.0205 | 1.9473 |
| S4             | 1.7789 | 2.0291 | 1.9557 |
| T1             | 0.8426 | 1.2807 | 0.7931 |
| T2             | 1.4146 | 1.8280 | 1.6464 |
| T3             | 1.4293 | 1.8511 | 1.6596 |
| T4             | 1.4511 | 1.8915 | 1.6719 |

  

| 1                                                                                   | 2                                                                                   | 3                                                                                    |
|-------------------------------------------------------------------------------------|-------------------------------------------------------------------------------------|--------------------------------------------------------------------------------------|
| 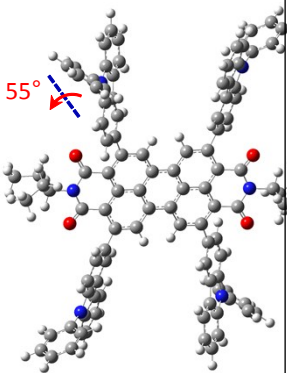 |  |  |



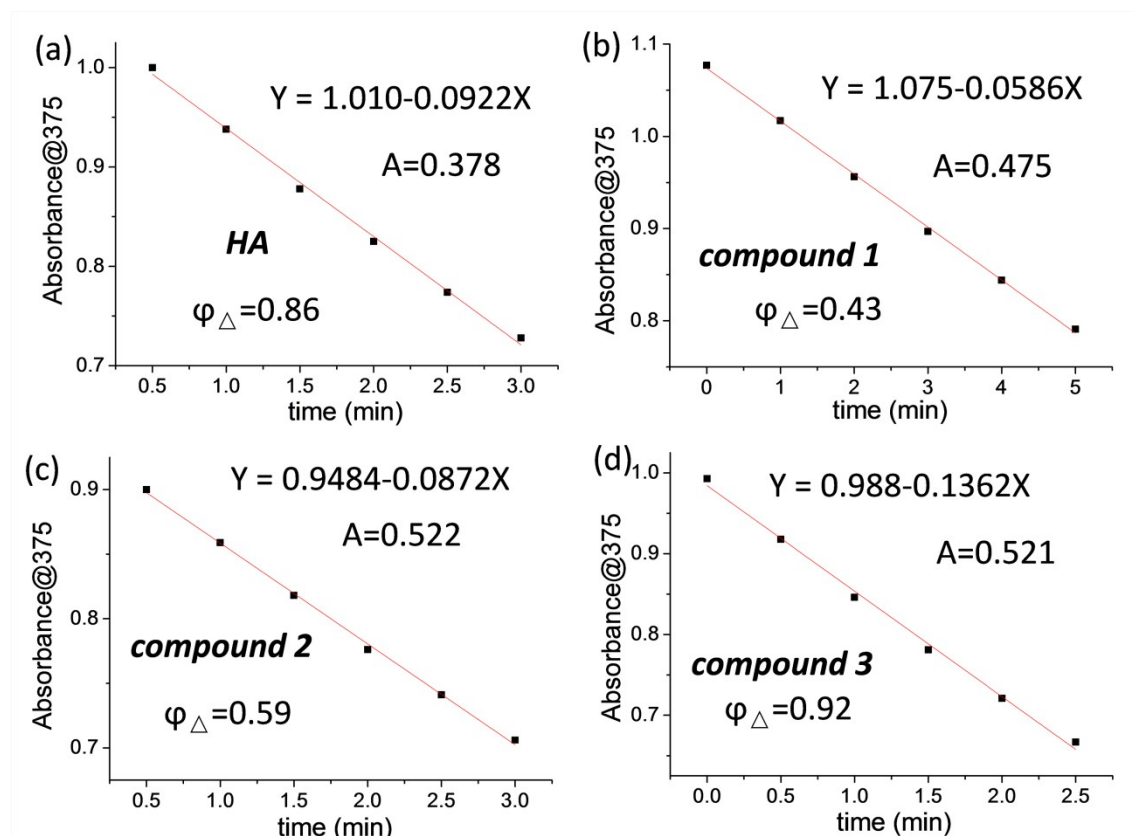

**Figure S11.** The decrease of the absorbance at 375 nm of DPA as a function of irradiation time for (a) hypocrellin A, (b) (c) (d) for 1-3. The linear fitting results are also shown.
